# Supplementary material
Source: PubMed Central journal article supplement (PMC7817064)
Supplement: NIHMS1659349-supplement-Supp_Table_1.pdf [file NIHMS1659349-supplement-Supp_Table_1.pdf]

**Table S1: Human Primer Sequences**

---

| Gene of interest | Primer Sequence                                                                |
|------------------|--------------------------------------------------------------------------------|
| Collagen 1       | Forward: GAG GGC CAA GAC GAA GAC ATC<br>Reverse: CAG ATC ACG TCA TCG CAC AAC   |
| Fibronectin 1    | Forward: AGG AAG CCG AGG TTT TAA CTG<br>Reverse: AGG ACG CTC ATA AGT GTC ACC   |
| PD-L1            | Forward: TTCTGT CCG CCT GCA GGG CATT<br>Reverse: AGG TCC TTG GGA ACC GTG ACA G |
| $\beta$ -Actin   | Forward: CAT GTA CGT TGC TAT CCA GGC<br>Reverse: CTC CTT AAT GTC ACG CAC GAT   |

---
